# Supplementary material
Source: publisher site journal article supplement (https://www.spandidos-publications.com/4978/downloadSupplementary)
Supplement: Supplementary file 1 [file downloadSupplementary]

## Sheet: AA_Low_vs_High_DFS
Table SVI. Differentially mutated genes in patients grouped by high or low DFS (median split).
Hugo_Symbol	Low DFS	High DFS	P-value	or	ci.up	ci.low	adjPval
F5	4	6	1	0	Inf	0	1
PRSS1	3	2	0.52381	4.91839	390.563	0.218046	0.642857
SETD8	3	3	0.571429	2.68677	208.741	0.116219	0.670807
BMP2K	2	0	0.133333	Inf	Inf	0.309589	0.514286
DNAH10	2	0	0.133333	Inf	Inf	0.309589	0.514286
MAGEF1	2	0	0.133333	Inf	Inf	0.309589	0.514286
MUC16	2	0	0.133333	Inf	Inf	0.309589	0.514286
MUC3A	2	0	0.133333	Inf	Inf	0.309589	0.514286
ARID1B	2	1	0.5	4.17095	351.464	0.141317	0.642857
CDC27	2	1	0.5	4.17095	351.464	0.141317	0.642857
PABPC1	2	1	0.5	4.17095	351.464	0.141317	0.642857
EPHB6	2	2	1	1.86195	48.9648	0.0768515	1
ZNF717	2	2	1	1.86195	48.9648	0.0768515	1
G6PD	1	2	1	0.693793	20.2967	0.00851224	1
MTHFR	0	4	0.0761905	0	1.79838	0	0.514286
TMIE	0	4	0.0761905	0	1.79838	0	0.514286
A2ML1	0	2	0.466667	0	8.07641	0	0.642857
GPRC6A	0	2	0.466667	0	8.07641	0	0.642857
HTT	0	2	0.466667	0	8.07641	0	0.642857
HYDIN	0	2	0.466667	0	8.07641	0	0.642857
MEF2A	0	2	0.466667	0	8.07641	0	0.642857
NOTCH4	0	2	0.466667	0	8.07641	0	0.642857
OR4Q3	0	2	0.466667	0	8.07641	0	0.642857
RAI1	0	2	0.466667	0	8.07641	0	0.642857
SIMC1	0	2	0.466667	0	8.07641	0	0.642857
TG	0	2	0.466667	0	8.07641	0	0.642857
TSC22D1	0	2	0.466667	0	8.07641	0	0.642857
P-values shown are obtained from Fisher’s exact test as implemented in maftools. AA, African-American; DFS, disease-free survival; or, odds ratio; ci.up, 95% confidence interval upper limit; ci.low, 95% confidence interval lower limit; adjPval, false discovery rate.

## Sheet: Hisp_Low_vs_high_DFS
Table SVI. Differentially mutated genes in patients grouped by high or low DFS (median split).
Hugo_Symbol	Low DFS	High DFS	P-value	or	ci.up	ci.low	adjPval
KIAA2018	6	3	0.265734	5.16556	365.124	0.274637	0.932401
MTHFR	7	5	0.461538	Inf	Inf	0.0299142	0.932401
F5	6	4	0.559441	2.75172	205.594	0.107822	0.932401
SETD8	4	3	1	1.30401	19.1262	0.09369	1
PRSS1	5	4	1	1.22862	24.711	0.0616535	1
P-values shown are obtained from Fisher’s exact test as implemented in maftools. Hisp, Hispanic; DFS, disease-free survival; or, odds ratio; ci.up, 95% confidence interval upper limit; ci.low, 95% confidence interval lower limit; adjPval, false discovery rate.
